## CORRESPONDENCE

**Holly Forcier**  
Clinical Research Engineer  
Department of Anesthesiology  
University of California, San Diego

**Matthew B. Weinger, M.D.**  
Associate Professor

Department of Anesthesiology  
University of California, San Diego  
Staff Physician, San Diego VA Medical Center  
3350 La Jolla Village Drive  
La Jolla, California 92093-9125

(Accepted for publication June 14, 1993.)

Anesthesiology  
79:627, 1993  
© 1993 American Society of Anesthesiologists, Inc.  
J. B. Lippincott Company, Philadelphia

## Ketamine Contains Benzethonium

*To the Editor:*—For a recent study Malinovsky *et al.* asked, "Is ketamine or its preservative responsible for neurotoxicity in the rabbit?"<sup>1</sup> They concluded, "The appearance of spinal cord lesions after intrathecal chlorobutanol strongly suggests that this preservative is responsible for apparent toxicity of ketamine and therefore should not be used in any solution intrathecally injected into humans." However, chlorobutanol, which they studied, is not the preservative used in commercial preparations of ketamine available in the United States. Parke-Davis (Morris Plains, NJ) uses benzethonium chloride, up to 0.1 mg/ml, in preparations sold in the United States.\* Malinovsky *et al.* studied ketamine solutions formulated in France, which, although also made by Parke-Davis (Courbevoie, France), are prepared differently than those made in the United States.†

Different preservatives probably explain the different findings of neurotoxicity reported in the world-wide literature referenced by Malinovsky *et al.* in their earlier study of ketamine toxicity.<sup>2</sup> Application, across national boundaries, of results from drug studies always must be interpreted carefully because the same drug, from the same

company, may be prepared and preserved differently in different countries.

**Robert E. Johnstone, M.D.**  
Department of Anesthesiology

**David J. Smith, Ph.D.**  
Departments of Anesthesiology and  
Pharmacology/Toxicology

West Virginia University  
Morgantown, West Virginia 26506

## References

1. Malinovsky JM, Lepage JY, Cozian A, Mussini JM, Pinaud M, Souron R: Is ketamine or its preservative responsible for neurotoxicity in the rabbit? *ANESTHESIOLOGY* 78:109–115, 1993
2. Malinovsky JM, Cozian A, Lepage JY, Mussini JM, Pinaud M, Souron R: Ketamine and midazolam neurotoxicity in the rabbit. *ANESTHESIOLOGY* 75:91–97, 1991

(Accepted for publication June 14, 1993.)

\* Ketalar (ketamine hydrochloride) package insert, Revised 1990. Morris Plains, Parke-Davis.

† Rhodes D: Personal communication. 1993.

Anesthesiology  
79:627, 1993  
© 1993 American Society of Anesthesiologists, Inc.  
J. B. Lippincott Company, Philadelphia

*In Reply:*—The commercial preparation available in France is formulated with chlorobutanol. However, since lesions have been observed in earlier studies using the preparation containing benzethonium chloride, studies also are needed to determine the spinal cord toxicity of ketamine with and without the latter preservative.

**Jean-Marc Malinovsky, M.D.**

Department d'Anesthésie-Reanimation Chirurgicale  
Centre Hospitalier et Universitaire  
1 Place Ricordeau  
44035 Nantes Cedex 01, France

(Accepted for publication June 14, 1993.)
